# Supplementary material for: Oncolytic adeno-immunotherapy modulates the immune system enabling CAR T-cells to cure pancreatic tumors
Source: PubMed Central journal article supplement (PMC7979740; doi:10.1038/s42003-021-01914-8), 2021-03-19
Supplement: 42003_2021_1914_MOESM3_ESM.pdf [file 42003_2021_1914_MOESM3_ESM.pdf]

## Description of Additional Supplementary Files

**File name:** Supplemental Data 1

**Description:** Nanostring Advanced Analysis from Left Tumor.

**File name:** Supplemental Data 2

**Description:** Nanostring Advanced Analysis from Right Tumor.

**File name:** Supplemental Data 3

**Description:** Nanostring Advanced Analysis comparing combination treatment to single agent treatments.

**File name:** Supplemental Data 4

**Description:** All source data underlying the graphs and charts presented in the main figures.
